# Supplementary material
Source: PubMed Central journal article supplement (PMC7287356)
Supplement: rspb20200559supp1.pdf [file rspb20200559supp1.pdf]

1 **ELECTRONIC SUPPLEMENTARY MATERIAL**

2  
3 Christie, K. and S.Y. Strauss. (2020). Frequency-dependent fitness and reproductive dynamics  
4 contribute to habitat segregation in sympatric Jewelflowers. *Proceedings of the Royal Society B:*  
5 *Biological Sciences*. DOI/10.1098/rspb.2020.0559.

6  
7 **List of Supplementary figures**

8  
9 Figure S1: Seed production and seed viability in experimental crosses using conspecific, mixed, and heterospecific  
10 pollen.

11  
12 Figure S2: NMDS ordination of physical site attributes, including soil texture and soil chemistry, of *S. breweri* and  
13 *S. hesperidis* sites at McLaughlin.

14  
15 Figure S3: Gravimetric water content of field soils at six adjacent *S. breweri* and *S. hesperidis* sites throughout the  
16 growing season.

17  
18 Figure S4: Germination success in habitat-specific soils in the greenhouse.

19  
20 Figure S5: Plant growth in a greenhouse competition experiment.

21  
22 **List of Supplementary tables**

23  
24 Table S0: Fixed-effects summary of GLMM predicting seed viability in experimental crosses.

25  
26 Table S1: Summary of physical site attributes, including soil texture and soil chemistry, of *S. breweri* and *S.*  
27 *hesperidis* sites at McLaughlin.

28  
29 Table S2.1: Fixed-effects summary of GLMM predicting germination success at two field sites in 2015.

30  
31 Table S2.2: Summary of GLM predicting germination success in habitat-specific soils in the greenhouse.

32  
33 Table S2.3: Fixed-effects summary of GLMM predicting survival in field transplant experiment.

34  
35 Table S2.4: Fixed-effects summary of GLMM predicting plant growth in field transplant experiment.

36  
37 Table S2.5: Fixed-effects summary of GLMM predicting fruit number in field transplant experiment.

38  
39 Table S2.6: Summary of GLM predicting survival in lathhouse soil transplant experiment.

40  
41 Table S2.7: Summary of GLM predicting plant growth in lathhouse soil transplant experiment.

42  
43 Table S2.8: Summary of GLM predicting flower number in lathhouse soil transplant experiment.

44  
45 Table S3.1: Summary of GLM predicting seed production in lathhouse soil transplant.

46  
47 Table S3.2: Summary of GLM predicting seed viability in lathhouse soil transplant.

48  
49 Table S3.3: Summary of GLMM predicting seed production in field transplant experiment.

50  
51 Table S3.4: Summary of GLMM predicting seed viability in field transplant experiment.

52  
53 Table S4: Model selection table showing best-fitting models explaining seed viability in experimental migrants.

54  
55 Table S5: Fixed-effects summary of best-fitting GLMM predicting seed viability in experimental migrants.

56 Experimental pollination

57 To assess the effects of heterospecific pollen transfer on seed viability we performed  
58 experimental crosses in the greenhouse using conspecific, heterospecific, and 50:50 pollen mixtures. We  
59 made crosses using individuals from six adjacent sites at McLaughlin, the same sites used in the field  
60 transplant experiment. We removed mature anthers from paternal plants with forceps, and manually  
61 applied pollen using anthers as paintbrushes, to the receptive stigmatic surfaces of bud-emasculated  
62 flowers of maternal plants. For the 50:50 pollen mixtures, we first completely saturated one half of the  
63 stigmatic surface with one species' pollen, and then completely covered the other half of the stigmatic  
64 surface with the other species' pollen in immediate succession. We alternated the order in which we  
65 applied pollen, and saturated stigmatic surfaces with pollen, far in excess of the number available ovules.  
66 In total, we made 291 crosses, including 97 intraspecific, 83 interspecific, 92 mixed-pollen, and 19  
67 control crosses, using multiple maternal (n = 24) and paternal (n = 38) donors. Of these, 118 successfully  
68 set fruit; we used these crosses (n = 42 conspecific pollen, n = 42 mixed pollen, n = 34 heterospecific  
69 pollen) to determine if seed viability differed depending on pollen treatment.

70 We modeled seed viability (viable or inviable) using a binomial GLMM in R (*glmer* function  
71 from the *lme4* package) with maternal species (*S. breweri*, *S. hesperidis*), pollen treatment (conspecific,  
72 50:50 mixed, heterospecific), and a maternal species\*pollen treatment interaction as fixed effects, with  
73 maternal and paternal individuals as random effects. We tested for differences among pollen treatments  
74 with Tukey's HSD tests using the *glht* function from the *multcomp* package in R.

75

76 Field soil moisture

77 To determine if soils at sites occupied by *S. breweri* and *S. hesperidis* differed in their water  
78 holding capacity, we measured gravimetric water content at six adjacent sites at three time points  
79 throughout the growing season (04/17/17, 05/14/17, 06/14/17). At each site, at each time point, we  
80 collected 10 soil cores from immediately beneath native plants at randomly selected microsites (n = 60  
81 total samples per time point). Cores consisted of the top 15cm of the substrate, the predominant area of  
82 root growth for *S. breweri* and *S. hesperidis*. We passed soils through 4mm and then 2mm sieves,  
83 transferred 20mL aliquots of field-wet soil into aluminum boats, and dried the soils at 100 C° overnight.  
84 We used the weights of field-wet soils and dried soils to calculate gravimetric water content ( $\Theta_d =$   
85 [weight of wet soil - weight of dry soil] / weight of dry soil). We tested for differences in water-holding  
86 capacity between sites occupied by each species using t-tests (04/17/17 and 06/14/17 measurements) and  
87 Mann-Whitney tests (05/14/17 measurements) with Bonferroni correction.

88

89

90 Germination

91 Two hundred seeds, of a total of 1000 seeds planted in one *S. breweri* site and an adjacent *S.*  
92 *hesperidis* site, germinated in the field in 2015. In addition to assessing germination success in different  
93 habitats/soils in the field (see main text), we also conducted a follow-up experiment in the greenhouse,  
94 using seeds and soils collected from all six sites represented in the field transplant experiment. Here, we  
95 first collected field soil from immediately under native plants, then planted field-collected seeds (n = 240  
96 total) into field soils in germination trays, and placed trays under a mist-bench in the greenhouse. The  
97 trays received automated mist for five minutes each hour, and ambient springtime light and temperature  
98 conditions in the UC Davis greenhouse. We assayed germination weekly for five weeks and counted the  
99 total number of germinants. We modeled germination success using a binomial GLM in R with species,  
100 soil type, and a species\*soil type interaction as fixed effects.

101

102 Lathhouse soil transplant

103 We first collected 76 soil cores from six adjacent *S. breweri* and *S. hesperidis* sites at McLaughlin  
104 (n soil cores = 152 total). While keeping the soil structure as undisturbed as possible, we transferred soil  
105 cores into cylindrical greenhouse pots (D40 Deepots), and then transplanted greenhouse-grown  
106 germinants (n = 76 per species) into site-specific soils. We grew plants in a mesh-covered lathhouse at  
107 UC Davis, and used a conservative watering schedule, and ambient light and temperature conditions in  
108 the late spring to approximate field conditions. We did not hand pollinate plants, but allowed insect  
109 pollinators to freely visit the plants, entering and exiting the lathhouse through a wide mesh netting. We  
110 randomized the position of pots and racks every two weeks throughout the experiment. We scored  
111 survival and plant height at the end of the growing season as in our field experiment, and used flower  
112 number as a proxy for potential fruit production. We assessed patterns of local adaptation to specific soils  
113 using GLMs with species, soil type and a species\*soil type interaction as fixed effects.

114 Additionally, to test the possibility that seed production and seed viability are associated with  
115 intrinsic properties of the soil (and unrelated to other ecological interactions in the field) we also scored  
116 seed production and seed viability of all survivors that produced fruit (n = 77), using a randomly-selected  
117 subset of five fruits per maternal individual. We modeled seed production (Gaussian) and seed viability  
118 (binomial) using GLMs in R with species, soil type, and a species\*soil type interaction as fixed effects.

119

120

121

122

123

124 **Supplementary Figures**  
 125

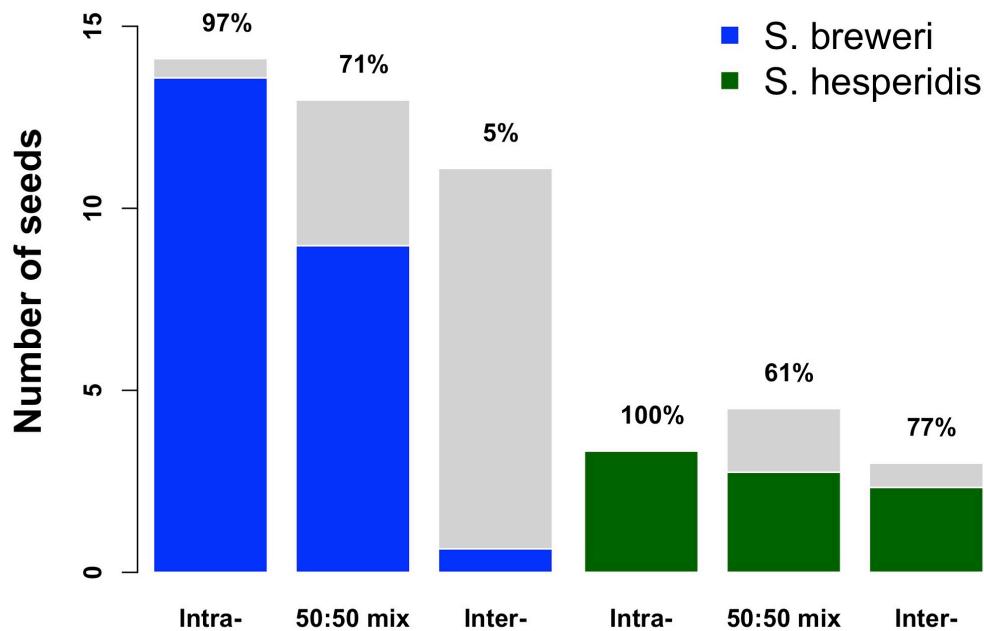

126  
 127 Figure S1: Seed viability in experimental crosses using conspecific, mixed (50:50), and heterospecific  
 128 pollen. The total height of each bar represents the total number of seeds produced; the blue (*S. breweri*)  
 129 and green (*S. hesperidis*) portions represents the average number of viable seeds, and the light gray  
 130 portions represent the average number of inviable seeds. Text above each bar indicates median model  
 131 predictions of seed viability from a GLMM.

132  
 133 Seed viability was reduced in both heterospecific ( $p < 0.001$ ) and mixed pollen ( $p < 0.001$ )  
 134 treatments compared to conspecific pollinations (Table S0; Fig. S1), and all cross types were significantly  
 135 different from one another (Tukey's HSD, all  $p$ -values  $< 0.001$ ). *S. breweri* produced 91-99% viable  
 136 seeds in conspecific crosses (90% confidence intervals from model predictions), 47-87% viable seeds in  
 137 mixed-pollen crosses, and 2-12% viable seeds in heterospecific crosses. *S. hesperidis* produced 100%  
 138 viable seeds in conspecific crosses, 30-84% viable seeds in mixed-pollen crosses, and 43-100% viable  
 139 seeds in heterospecific crosses, however the majority of *S. hesperidis* crosses (including intraspecific  
 140 crosses) failed in this experiment, so these predictions are based on only 13 successful crosses.  
 141 Potentially due to this small sample size, we did not observe a significant species\*pollen source  
 142 interaction (Table S0), however qualitatively, *S. hesperidis* suffered a less severe reduction in seed  
 143 viability in heterospecific crosses compared to *S. breweri* (Fig. S1). This asymmetric reduction in seed  
 144 viability following heterospecific pollen transfer is consistent with previous work showing less severe  
 145 intrinsic postzygotic reproductive isolation at the seed production stage for *S. hesperidis*<sup>57</sup>.

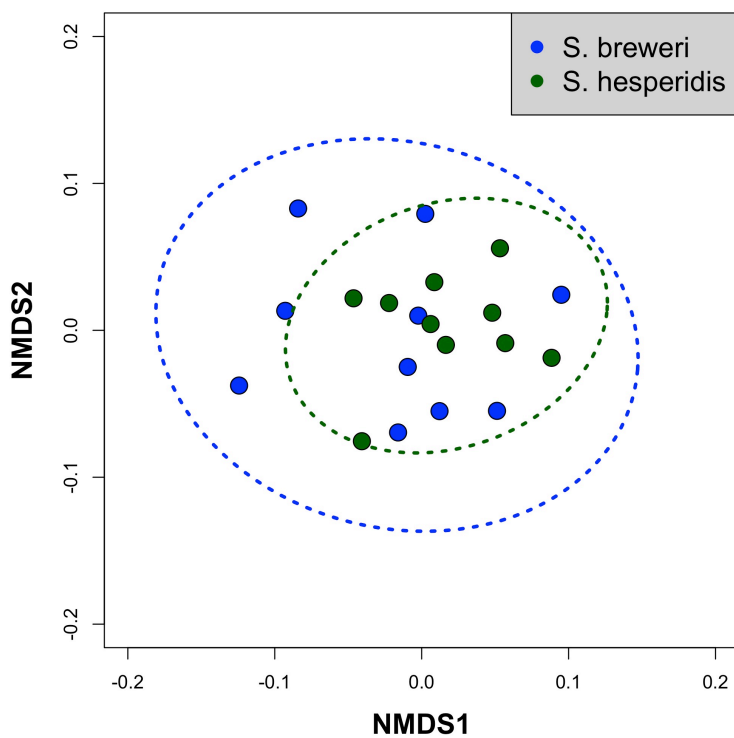

146

147 Figure S2: NMDS ordination of 33 physical site attributes, including soil texture and soil chemistry, for  
 148 20 *S. breweri* (n = 10) and *S. hesperidis* (n = 10) sites at McLaughlin. Points represent individual sites;  
 149 ellipses represent 95% confidence intervals for abiotic niche breadth. We found no evidence for abiotic  
 150 niche differences with respect to the combination of physical site attributes, and soil texture and soil  
 151 chemistry variables (*adonis2* permutation test,  $p = 0.49$ ).

152

153

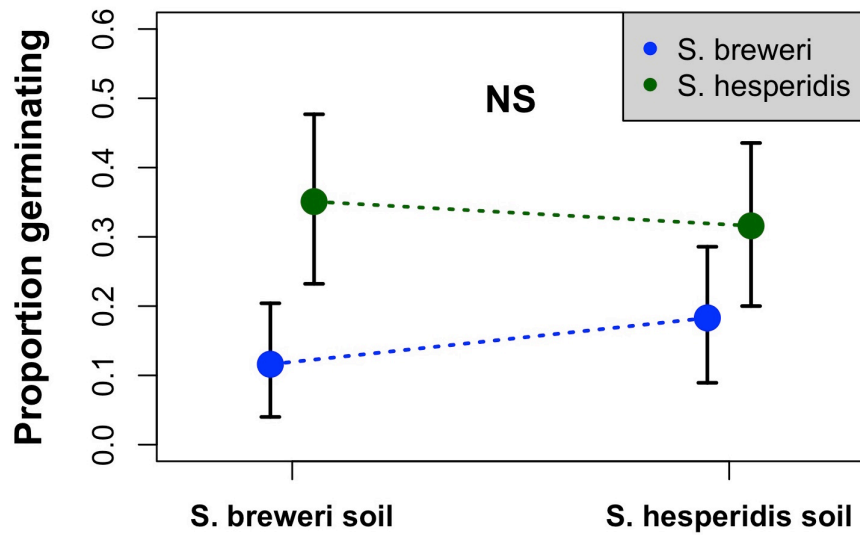

154  
 155 Figure S3: Germination success in site-specific soils in the greenhouse. Points indicate mean model  
 156 predictions, and error bars show 95% confidence intervals. Similar to findings from the field (Fig. 2A),  
 157 we found no evidence for a home-soil germination advantage when we planted seeds in site-specific field  
 158 soils in the greenhouse (species\*soil source interaction,  $p = 0.30$ ). Seeds of both species germinated  
 159 equally well in both soils.

160  
 161  
 162  
 163  
 164  
 165  
 166  
 167  
 168

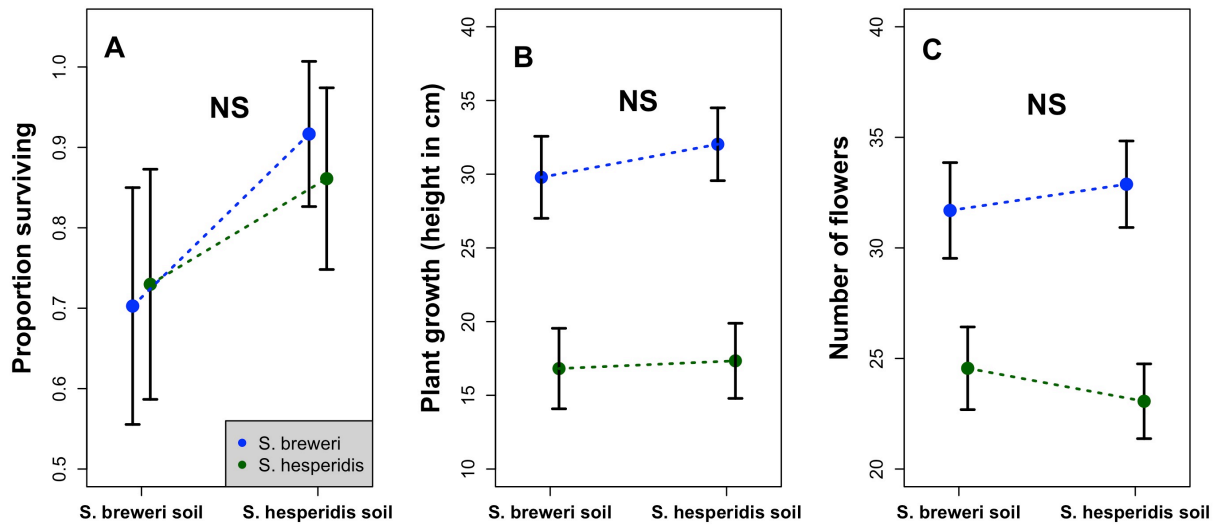

169

170 Figure S4: Average fitness associated with survival and growth in habitat-specific soils in the lathhouse.

171 A.) Survival; B.) Plant height at the end of the growing season; C.) Flower production. Points represent

172 mean model predictions; error bars show 95% confidence intervals; text depicts significance of

173 species\*soil type interactions.

174

175

176

177

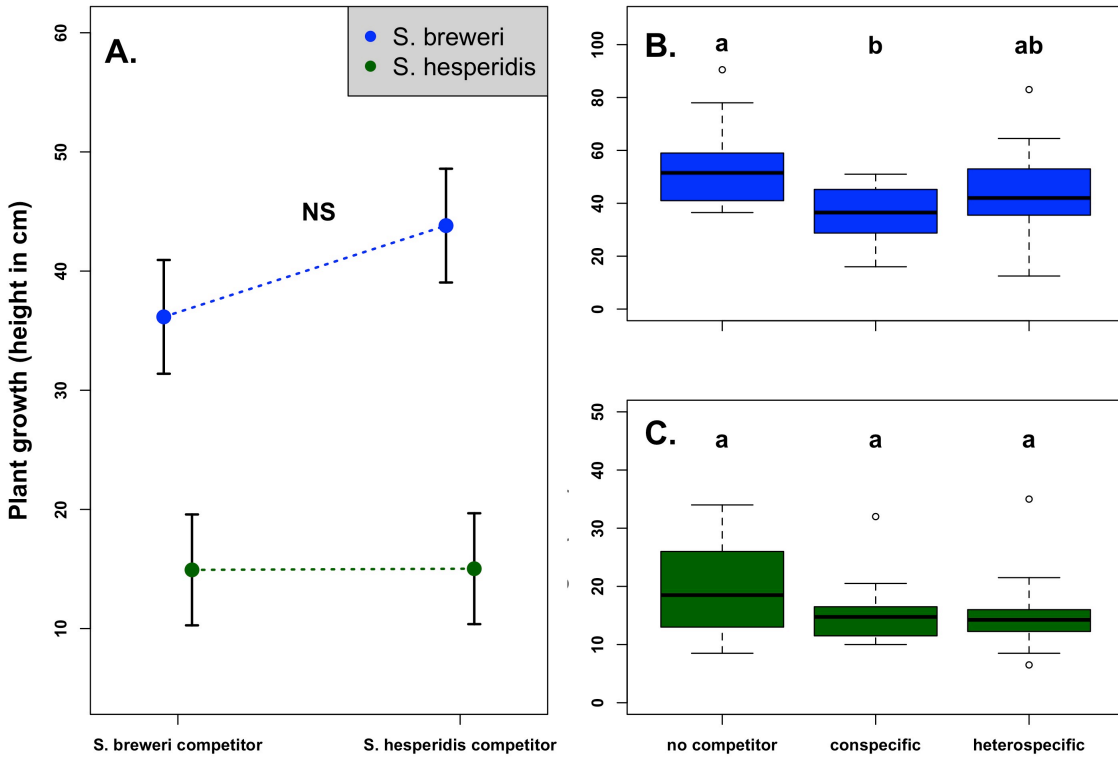

178

179 Figure S5: A. Plant growth when each species competed with conspecific and heterospecific competitors  
 180 in single pots in the greenhouse. We found no differences in growth depending upon whether the  
 181 competitor was a conspecific or a heterospecific (species\*competitor interaction,  $p = 0.12$ ). B. Plant  
 182 growth for *S. breweri* (blue) when growing alone, with a conspecific competitor, and with a heterospecific  
 183 competitor; treatments not sharing a letter are significantly different at the 95% confidence level using a  
 184 Tukey's HSD test. C. The same data for *S. hesperidis* (green).

185

186 There were no differences in the relative effects of intra- compared to interspecific competition  
 187 for either species (Fig. S5B; Fig S5C). Interestingly, the smaller *S. hesperidis* (often 50% smaller than *S.*  
 188 *breweri*) showed no decrease in height when it competed with its larger congener, when it competed with  
 189 a conspecific, and when it grew without a competitor (Fig. S5C).

190

191

192

193

194

195

196



197 **Supplementary Tables**

198

**Table S0: Seed viability in experimental pollinations in the greenhouse**

Model (binomial): seed viability ~ maternal species + pollen treatment + maternal species\*pollen treatment + (1|maternal individual) + (1|paternal individual)

| <u>Factor</u>                                                                 | <u>Estimate</u> | <u>SE</u> | <u>z value</u> | <u>p-value</u> |
|-------------------------------------------------------------------------------|-----------------|-----------|----------------|----------------|
| maternal species ( <i>S. hesperidis</i> )                                     | 15.7454         | 457.9476  | 0.034          | 0.973          |
| treatment (mixed pollen)                                                      | -2.5196         | 0.2573    | -9.792         | <2E-16         |
| treatment (heterospecific pollen)                                             | -6.4463         | 0.3524    | -18.294        | <2E-16         |
| maternal species ( <i>S. hesperidis</i> ) * treatment (mixed pollen)          | -16.2169        | 457.9469  | -0.035         | 0.972          |
| maternal species ( <i>S. hesperidis</i> ) * treatment (heterospecific pollen) | -11.5811        | 457.9494  | -0.025         | 0.98           |

199

200

201 Table S1: Summary of physical site attributes of *S. breweri* and *S. hesperidis* sites at McLaughlin.

| <u>Site variable</u>            | <u>S. breweri (mean)</u> | <u>S. hesperidis (mean)</u> | <u>t.test p-value</u> | <u>adjusted p-value</u> | <u>n_sites (S. breweri, S. hesperidis)</u> |
|---------------------------------|--------------------------|-----------------------------|-----------------------|-------------------------|--------------------------------------------|
| Elevation (feet)                | 2072.94                  | 2124.33                     | 0.6796                | 1                       | (17, 15)                                   |
| Aspect (degrees)                | 212.82                   | 196.13                      | 0.6862                | 1                       | (17, 15)                                   |
| Slope (degrees)                 | 15.24                    | 12.07                       | 0.2357                | 1                       | (17, 15)                                   |
| Soil depth (cm)                 | 16.76                    | 16.52                       | 0.8750                | 1                       | (17, 15)                                   |
| Bedrock (% cover)               | 3.75                     | 5.69                        | 0.2971                | 1                       | (17, 15)                                   |
| Boulders (% cover)              | 2.32                     | 3.33                        | 0.4081                | 1                       | (17, 15)                                   |
| Avg. large rock (% cover)       | 5.54                     | 9.17                        | <b>0.0063</b>         | 0.2194                  | (17, 15)                                   |
| Cobble (% cover)                | 5.34                     | 6.57                        | 0.3499                | 1                       | (17, 15)                                   |
| Gravel (% cover)                | 78.75                    | 71.41                       | 0.0861                | 1                       | (17, 15)                                   |
| Litter (% cover)                | 4.26                     | 3.81                        | 0.6520                | 1                       | (17, 15)                                   |
| Veg. basal area (% cover)       | 0.03                     | 0.01                        | 0.1622                | 1                       | (17, 15)                                   |
| Soil color - red (RGB)          | 124.19                   | 123.57                      | 0.8449                | 1                       | (18, 17)                                   |
| Soil color - green (RGB)        | 119.06                   | 116.05                      | 0.2955                | 1                       | (18, 17)                                   |
| Soil color - blue (RGB)         | 113.51                   | 108.00                      | 0.0810                | 1                       | (18, 17)                                   |
| Rockiness (proportion >15mm)    | 0.15                     | 0.11                        | 0.2452                | 1                       | (17, 15)                                   |
| Rockiness (proportion 4mm-15mm) | 0.23                     | 0.19                        | <b>0.0128</b>         | 0.4479                  | (17, 15)                                   |
| Rockiness (proportion 2mm-4mm)  | 0.15                     | 0.16                        | 0.8020                | 1                       | (17, 15)                                   |
| Rockiness (proportion <2mm)     | 0.46                     | 0.54                        | <b>0.0467</b>         | 1                       | (17, 15)                                   |
| Saturation percentage (SP)      | 42.80                    | 40.70                       | 0.2555                | 1                       | (10, 10)                                   |
| Boron                           | 0.15                     | 0.05                        | 0.2846                | 1                       | (10, 10)                                   |
| Nitrate (NO <sub>3</sub> )      | 1.03                     | 0.59                        | 0.0520                | 1                       | (10, 10)                                   |
| Phosphorus (Olsen method)       | 4.77                     | 2.73                        | 0.1119                | 1                       | (10, 10)                                   |
| Potassium (ppm)                 | 30.15                    | 34.75                       | 0.4609                | 1                       | (10, 10)                                   |
| Potassium                       | 0.08                     | 0.09                        | 0.4355                | 1                       | (10, 10)                                   |
| Sodium (ppm)                    | 4.00                     | 3.80                        | 0.7642                | 1                       | (10, 10)                                   |
| Sodium                          | 0.02                     | 0.02                        | 0.4709                | 1                       | (10, 10)                                   |
| Calcium                         | 0.89                     | 0.90                        | 0.9542                | 1                       | (10, 10)                                   |
| Magnesium                       | 9.67                     | 11.79                       | 0.3677                | 1                       | (10, 10)                                   |
| Ca:Mg ratio                     | 0.10                     | 0.08                        | 0.1287                | 1                       | (10, 10)                                   |
| Cation exchange capacity        | 10.65                    | 12.79                       | 0.3793                | 1                       | (10, 10)                                   |
| Organic matter (LOI method)     | 1.78                     | 2.03                        | 0.3546                | 1                       | (10, 10)                                   |
| pH                              | 7.22                     | 7.04                        | 0.1866                | 1                       | (10, 10)                                   |
| % Sand                          | 75.70                    | 73.50                       | 0.3750                | 1                       | (10, 10)                                   |
| % Silt                          | 12.80                    | 12.65                       | 0.8843                | 1                       | (10, 10)                                   |
| % Clay                          | 11.50                    | 13.85                       | 0.1883                | 1                       | (10, 10)                                   |

202

203

204

205

206

**Table S2.1: Germination success at two field sites in 2015**

Model (binomial): germination ~ species + habitat + species\*habitat + (1|experimental block)

| <u>Factor</u>                                                       | <u>Estimate</u> | <u>SE</u> | <u>z value</u> | <u>p-value</u>  |
|---------------------------------------------------------------------|-----------------|-----------|----------------|-----------------|
| species ( <i>S. hesperidis</i> )                                    | 1.165           | 0.2509    | 4.643          | <b>3.43E-06</b> |
| habitat ( <i>S. hesperidis</i> )                                    | 0.6917          | 0.387     | 1.787          | 0.0739          |
| species ( <i>S. hesperidis</i> ) * habitat ( <i>S. hesperidis</i> ) | -1.035          | 0.3382    | -3.06          | <b>0.0022</b>   |

**Table S2.2: Germination success in the greenhouse in field soils from six sites**

Model (binomial): germination ~ species + soil type + species\*soil type

| <u>Factor</u>                                                         | <u>Estimate</u> | <u>SE</u> | <u>z value</u> | <u>p-value</u> |
|-----------------------------------------------------------------------|-----------------|-----------|----------------|----------------|
| species ( <i>S. hesperidis</i> )                                      | 1.4053          | 0.4847    | 2.8990         | <b>0.0037</b>  |
| soil type ( <i>S. hesperidis</i> )                                    | 0.5305          | 0.5225    | 1.0150         | 0.3100         |
| species ( <i>S. hesperidis</i> ) * soil type ( <i>S. hesperidis</i> ) | -0.6806         | 0.6506    | -1.0460        | 0.2956         |

**Table S2.3: Survival in a field transplant experiment**

Model (binomial): survival ~ species + habitat + site + species\*habitat + (1|experimental block)

| <u>Factor</u>                                                       | <u>Estimate</u> | <u>SE</u> | <u>z value</u> | <u>p-value</u> |
|---------------------------------------------------------------------|-----------------|-----------|----------------|----------------|
| species ( <i>S. hesperidis</i> )                                    | -1.6101         | 0.5337    | -3.0170        | <b>0.0026</b>  |
| habitat ( <i>S. hesperidis</i> )                                    | -0.0643         | 0.7249    | -0.0890        | 0.9293         |
| site ("Napa Junction")                                              | 0.7055          | 0.6236    | 1.1310         | 0.2579         |
| site ("Quarry View")                                                | -0.6572         | 0.5482    | -1.1990        | 0.2306         |
| species ( <i>S. hesperidis</i> ) * habitat ( <i>S. hesperidis</i> ) | 3.0797          | 1.2550    | 2.4540         | <b>0.0141</b>  |

**Table S2.4: Plant growth in a field transplant experiment**

Model (Gaussian): height (cm) ~ species + habitat + site + species\*habitat + (1|experimental block)

| <u>Factor</u>                                                       | <u>Estimate</u> | <u>SE</u> | <u>t value</u> | <u>p-value</u> |
|---------------------------------------------------------------------|-----------------|-----------|----------------|----------------|
| species ( <i>S. hesperidis</i> )                                    | -7.2230         | 0.9736    | -7.4190        | <b>1.5E-12</b> |
| habitat ( <i>S. hesperidis</i> )                                    | 0.1420          | 1.6426    | 0.0860         | 0.9314         |
| site ("Napa Junction")                                              | -2.9276         | 1.8512    | -1.5810        | 0.1229         |
| site ("Quarry View")                                                | -3.3036         | 1.8489    | -1.7870        | 0.0826         |
| species ( <i>S. hesperidis</i> ) * habitat ( <i>S. hesperidis</i> ) | -0.4161         | 1.5314    | -0.2720        | 0.7860         |

**Table S2.5: Fruit production in a field transplant experiment**

Model (negative binomial): fruit number ~ species + habitat + site + species\*habitat + (1|experimental block)

| <u>Factor</u>                                                       | <u>Estimate</u> | <u>SE</u> | <u>z value</u> | <u>p-value</u> |
|---------------------------------------------------------------------|-----------------|-----------|----------------|----------------|
| species ( <i>S. hesperidis</i> )                                    | 0.1467          | 0.1455    | 1.0080         | 0.3134         |
| habitat ( <i>S. hesperidis</i> )                                    | -0.1591         | 0.3162    | -0.5030        | 0.6149         |
| site ("Napa Junction")                                              | -0.4074         | 0.3718    | -1.0960        | 0.2731         |
| site ("Quarry View")                                                | -0.8761         | 0.3738    | <b>-2.3440</b> | <b>0.0191</b>  |
| species ( <i>S. hesperidis</i> ) * habitat ( <i>S. hesperidis</i> ) | 0.3254          | 0.2276    | 1.4290         | 0.1529         |

**Table S2.6: Survival in a lathhouse soil transplant experiment**

Model (binomial): survival ~ species + soil type+ species\*soil type

| <u>Factor</u>                                                         | <u>Estimate</u> | <u>SE</u> | <u>z value</u> | <u>p-value</u> |
|-----------------------------------------------------------------------|-----------------|-----------|----------------|----------------|
| species ( <i>S. hesperidis</i> )                                      | 0.1331          | 0.5161    | 0.2580         | 0.7966         |
| soil type ( <i>S. hesperidis</i> )                                    | 1.5377          | 0.7021    | 2.1900         | <b>0.0285</b>  |
| species ( <i>S. hesperidis</i> ) * soil type ( <i>S. hesperidis</i> ) | -0.7064         | 0.9286    | -0.7610        | 0.4468         |

**Table S2.7: Plant growth (height) in a lathhouse soil transplant experiment**

Model (Gaussian): height in mm ~ species + soil type + species\*soil type

| <u>Factor</u>                                                         | <u>Estimate</u> | <u>SE</u> | <u>t value</u> | <u>p-value</u>  |
|-----------------------------------------------------------------------|-----------------|-----------|----------------|-----------------|
| species ( <i>S. hesperidis</i> )                                      | -129.7400       | 19.8900   | -6.5220        | <b>2.02E-09</b> |
| soil type ( <i>S. hesperidis</i> )                                    | 22.4200         | 18.9800   | 1.1810         | 0.2400          |
| species ( <i>S. hesperidis</i> ) * soil type ( <i>S. hesperidis</i> ) | -17.1800        | 26.9000   | -0.6390        | 0.5240          |

**Table S2.8: Flower production in a lathhouse soil transplant experiment**

Model (Poisson): flower number ~ species + soil type + species\*soil type

| <u>Factor</u>                                                         | <u>Estimate</u> | <u>SE</u> | <u>z value</u> | <u>p-value</u>  |
|-----------------------------------------------------------------------|-----------------|-----------|----------------|-----------------|
| species ( <i>S. hesperidis</i> )                                      | -0.2551         | 0.0522    | -4.8900        | <b>1.01E-06</b> |
| soil type ( <i>S. hesperidis</i> )                                    | 0.0368          | 0.0462    | 0.7950         | 0.4260          |
| species ( <i>S. hesperidis</i> ) * soil type ( <i>S. hesperidis</i> ) | -0.0994         | 0.0710    | -1.4000        | 0.1620          |

**Table S3.1: Seed production in a lathhouse soil transplant experiment**

Model (Gaussian): total seeds per fruit ~ species + soil type + site + species\*soil type

| <u>Factor</u>                                                         | <u>Estimate</u> | <u>SE</u> | <u>t value</u> | <u>p-value</u> |
|-----------------------------------------------------------------------|-----------------|-----------|----------------|----------------|
| species ( <i>S. hesperidis</i> )                                      | -6.4900         | 1.6480    | -3.9370        | <b>0.0002</b>  |
| soil type ( <i>S. hesperidis</i> )                                    | -2.8720         | 1.4190    | -2.0240        | <b>0.0467</b>  |
| site (“Napa Junction”)                                                | 3.9080          | 2.6510    | 1.4740         | 0.1449         |
| site (“Quarry View”)                                                  | -1.0110         | 2.8110    | -0.3600        | 0.7202         |
| species ( <i>S. hesperidis</i> ) * soil type ( <i>S. hesperidis</i> ) | 4.4190          | 2.4590    | 1.7970         | 0.0766         |

**Table S3.2: Seed viability in a lathhouse soil transplant experiment**

Model (binomial): seed viability ~ species + soil type + site + species\*soil type

| <u>Factor</u>                                                         | <u>Estimate</u> | <u>SE</u> | <u>z value</u> | <u>p-value</u> |
|-----------------------------------------------------------------------|-----------------|-----------|----------------|----------------|
| species ( <i>S. hesperidis</i> )                                      | -0.0600         | 0.1256    | -0.4770        | 0.6330         |
| soil type ( <i>S. hesperidis</i> )                                    | -0.0743         | 0.0891    | -0.8340        | 0.4044         |
| site (“Napa Junction”)                                                | 0.7440          | 0.1893    | 3.9310         | <b>0.0001</b>  |
| site (“Quarry View”)                                                  | -0.1077         | 0.2069    | -0.5210        | 0.6027         |
| species ( <i>S. hesperidis</i> ) * soil type ( <i>S. hesperidis</i> ) | -0.6408         | 0.1939    | -3.3050        | <b>0.0009</b>  |

**Table S3.3: Seed production in a field transplant experiment**

Model (Gaussian): total seeds per fruit ~ species + habitat + site + species\*habitat + (1|experimental block)

| <u>Factor</u>                                                       | <u>Estimate</u> | <u>SE</u> | <u>z value</u> | <u>p-value</u>  |
|---------------------------------------------------------------------|-----------------|-----------|----------------|-----------------|
| species ( <i>S. hesperidis</i> )                                    | -21.3540        | 3.5200    | -6.0670        | <b>8.48E-08</b> |
| habitat ( <i>S. hesperidis</i> )                                    | -19.3340        | 3.6650    | -5.2760        | <b>1.70E-06</b> |
| site (“Napa Junction”)                                              | 5.2350          | 3.4150    | 1.5330         | 0.1300          |
| site (“Quarry View”)                                                | 1.6090          | 3.4140    | 0.4710         | 0.6390          |
| species ( <i>S. hesperidis</i> ) * habitat ( <i>S. hesperidis</i> ) | 36.5150         | 5.4050    | 6.7550         | <b>5.07E-09</b> |

**Table S3.4: Seed viability in a field transplant experiment**

Model (binomial): seed viability ~ species + habitat + site + species\*habitat + (1|experimental block)

| <u>Factor</u>                                                       | <u>Estimate</u> | <u>SE</u> | <u>z value</u> | <u>p-value</u>  |
|---------------------------------------------------------------------|-----------------|-----------|----------------|-----------------|
| species ( <i>S. hesperidis</i> )                                    | -2.9991         | 0.4363    | -6.8740        | <b>6.25E-12</b> |
| habitat ( <i>S. hesperidis</i> )                                    | -2.6314         | 0.4518    | -5.8250        | <b>5.72E-09</b> |
| site (“Napa Junction”)                                              | 0.4748          | 0.4181    | 1.1360         | 0.2560          |
| site (“Quarry View”)                                                | -0.0541         | 0.4151    | -0.1300        | 0.8960          |
| species ( <i>S. hesperidis</i> ) * habitat ( <i>S. hesperidis</i> ) | 5.0882          | 0.6634    | 7.6700         | <b>1.72E-14</b> |

208

209

210

211

**Table S4: Model selection table showing best-fitting models (delta AICc ≤2) explaining seed viability in experimental migrants.**

| <u>n conspecifics</u> | <u>n fruits</u> | <u>n fruits per resident</u> | <u>site</u> | <u>species</u> | <u>n conspecifics *species</u> | <u>df</u> | <u>logLik</u> | <u>AICc</u> | <u>delta AICc</u> | <u>AICc weight</u> |
|-----------------------|-----------------|------------------------------|-------------|----------------|--------------------------------|-----------|---------------|-------------|-------------------|--------------------|
| X                     |                 |                              | X           |                |                                | 5         | -939.934      | 1890.4      | 0                 | 0.126              |
| X                     |                 |                              |             |                |                                | 3         | -942.629      | 1891.5      | 1.07              | 0.074              |
|                       |                 |                              | X           |                |                                | 4         | -941.71       | 1891.8      | 1.37              | 0.064              |
| X                     |                 |                              | X           | X              |                                | 6         | -939.546      | 1891.8      | 1.44              | 0.062              |
|                       |                 |                              |             |                |                                | 2         | -943.965      | 1892        | 1.63              | 0.056              |
| X                     |                 |                              |             | X              | X                              | 5         | -940.844      | 1892.2      | 1.82              | 0.051              |
| X                     | X               |                              |             | X              |                                | 6         | -939.836      | 1892.4      | 2.02              | 0.046              |

212

**Table S5: Seed viability of experimental migrants in a field transplant experiment**

Model (binomial): seed viability ~ number of conspecifics per block + site + (1|block)

| <u>Factor</u>          | <u>Estimate</u> | <u>SE</u> | <u>z value</u> | <u>p-value</u> |
|------------------------|-----------------|-----------|----------------|----------------|
| number of conspecifics | 0.1903          | 0.1004    | 1.895          | <b>0.0581</b>  |
| site ("Napa Junction") | 0.3706          | 0.4564    | 0.812          | 0.4168         |
| site ("Quarry View")   | -0.6467         | 0.4759    | -1.359         | 0.1741         |

213
